# Supplementary material for: A systematic literature review of math interventions across educational settings from early childhood education to high school
Source: Frontiers journal article supplement (doi:10.3389/feduc.2023.1229849), 2023-12-14
Supplement: Data_Sheet_1.docx [file Data_Sheet_1.docx]

**Appendix**

*Reference list of the included math interventions*

Barnes, M. A., Klein, A., Swank, P., Starkey, P., McCandliss, B., Flynn, K., Zucker, T., Huang, C.-W., Fall, A.-M., & Roberts, G. (2016). Effects of Tutorial Interventions in Mathematics and Attention for Low-Performing Preschool Children. *Journal of Research on Educational Effectiveness*, *9*(4), 577-606. https://doi.org/10.1080/19345747.2016.1191575

Blair, C., & Raver, C. C. (2014). Closing the achievement gap through modification of neurocognitive and neuroendocrine function: results from a cluster randomized controlled trial of an innovative approach to the education of children in kindergarten. *PLoS One*, *9*(11), e112393-e112393. https://doi.org/10.1371/journal.pone.0112393

Blanton, M., Stroud, R., Stephens, A., Gardiner, A. M., Stylianou, D. A., Knuth, E., Isler-Baykal, I., & Strachota, S. (2019). Does Early Algebra Matter? The Effectiveness of an Early Algebra Intervention in Grades 3 to 5. *American Educational Research Journal*, *56*(5), 1930-1972. https://doi.org/10.3102/0002831219832301

Bleses, D., Jensen, P., Slot, P., & Justice, L. (2020). Low-cost teacher-implemented intervention improves toddlers’ language and math skills. *Early Childhood Research Quarterly*, *53*, 64-76. https://doi.org/10.1016/j.ecresq.2020.03.001

Clarke, B., Doabler, C. T., Kosty, D., Kurtz Nelson, E., Smolkowski, K., Fien, H., & Turtura, J. (2017). Testing the Efficacy of a Kindergarten Mathematics Intervention by Small Group Size. *AERA open*, *3*(2), 233285841770689. https://doi.org/10.1177/2332858417706899

Clements, D. H., & Sarama, J. (2008). Experimental Evaluation of the Effects of a Research-Based Preschool Mathematics Curriculum. *American Educational Research Journal*, *45*(2), 443-494. https://doi.org/10.3102/0002831207312908

Clements, D. H., Sarama, J., Layzer, C., Unlu, F., & Fesler, L. (2020). Effects on Mathematics and Executive Function of a Mathematics and Play Intervention Versus Mathematics Alone. *Journal for Research in Mathematics Education*, *51*(3), 301-333. https://doi.org/10.5951/jresemtheduc-2019-0069

Clements, D. H., Sarama, J., Spitler, M. E., Lange, A. A., & Wolfe, C. B. (2011). Mathematics Learned by Young Children in an Intervention Based on Learning Trajectories: A Large-Scale Cluster Randomized Trial. *Journal For Research in Mathematics Education*, *42*(2), 127-166. https://doi.org/10.5951/jresematheduc.42.2.0127

Doabler, C. T., Clarke, B., Kosty, D., Turtura, J. E., Firestone, A. R., Smolkowski, K., Jungjohann, K., Brafford, T. L., Nelson, N. J., Sutherland, M., Fien, H., & Maddox, S. A. (2019). Efficacy of a First-Grade Mathematics Intervention on Measurement and Data Analysis. *Exceptional Children*, *86*(1), 77-94. https://doi.org/10.1177/0014402919857993

Dowker, A. (2016). Factors That Influence Improvement in Numeracy, Reading, and Comprehension in the Context of a Numeracy Intervention. *Frontiers in Psychology*, *7*, 1929-1929. https://doi.org/10.3389/fpsyg.2016.01929

Early, D. M., Berg, J. K., Alicea, S., Si, Y., Aber, J. L., Ryan, R. M., & Deci, E. L. (2016). The Impact of Every Classroom, Every Day on High School Student Achievement: Results From a School-Randomized Trial. *Journal of Research on Educational Effectiveness*, *9*(1), 3-29. https://doi.org/10.1080/19345747.2015.1055638

Eble, A., Frost, C., Camara, A., Bouy, B., Bah, M., Sivaraman, M., Hsieh, P.-T. J., Jayanty, C., Brady, T., Gawron, P., Vansteelandt, S., Boone, P., & Elbourne, D. (2021). How much can we remedy very low learning levels in rural parts of low-income countries? Impact and generalizability of a multi-pronged para-teacher intervention from a cluster-randomized trial in the Gambia. *Journal of Development Economics*, *148*, 102539. https://doi.org/10.1016/j.jdeveco.2020.102539

Fabian, K., & Topping, K. J. (2019). Putting “mobile” into mathematics: Results of a randomised controlled trial. *Contemporary Educational Psychology*, *59*, 101783. https://doi.org/10.1016/j.cedpsych.2019.101783

Fantuzzo, J. W., Gadsden, V. L., & McDermott, P. A. (2011). An Integrated Curriculum to Improve Mathematics, Language, and Literacy for Head Start Children. *American Educational Research Journal*, *48*(3), 763-793. https://doi.org/10.3102/0002831210385446

Fazzio, I., Eble, A., Lumsdaine, R. L., Boone, P., Bouy, B., Hsieh, P.-T. J., Jayanty, C., Johnson, S., & Silva, A. F. (2021). Large learning gains in pockets of extreme poverty: Experimental evidence from Guinea Bissau. *Journal of Public Economics*, *199*, 104385. https://doi.org/10.1016/j.jpubeco.2021.104385

Fien, H., Doabler, C. T., Nelson, N. J., Kosty, D. B., Clarke, B., & Baker, S. K. (2016). An Examination of the Promise of the NumberShire Level 1 Gaming Intervention for Improving Student Mathematics Outcomes. *Grantee Submission*, *9*(4), 635-661. https://doi.org/10.1080/19345747.2015.1119229

Flynn, R. J., Marquis, R. A., Paquet, M.-P., Peeke, L. M., & Aubry, T. D. (2012). Effects of individual direct-instruction tutoring on foster children's academic skills: A randomized trial. *Children and Youth Services Review*, *34*(6), 1183-1189. https://doi.org/10.1016/j.childyouth.2012.01.036

Foster, M. E., Anthony, J. L., Clements, D. H., Sarama, J., & Williams, J. J. (2018). Hispanic dual language learning kindergarten students' response to a numeracy intervention: A randomized control trial. *Early Childhood Research Quarterly*, *43*, 83-95. https://doi.org/10.1016/j.ecresq.2018.01.009

Fuchs, L. S., Fuchs, D., Compton, D. L., Wehby, J., Schumacher, R. F., Gersten, R., & Jordan, N. C. (2015). Inclusion Versus Specialized Intervention for Very-Low-Performing Students: What Does Access Mean in an Era of Academic Challenge? *Exceptional Children*, *81*(2), 134-157. https://doi.org/10.1177/0014402914551743

Fuchs, L. S., Schumacher, R. F., Long, J., Namkung, J., Malone, A. S., Wang, A., Hamlett, C. L., Jordan, N. C., Siegler, R. S., & Changas, P. (2016). Effects of Intervention to Improve At-Risk Fourth Graders’ Understanding, Calculations, and Word Problems with Fractions. *The Elementary School Journal*, *116*(4), 625-651. https://doi.org/10.1086/686303

Fuchs, L. S., Wang, A. Y., Preacher, K. J., Malone, A. S., Fuchs, D., & Pachmayr, R. (2021). Addressing Challenging Mathematics Standards With At-Risk Learners: A Randomized Controlled Trial on the Effects of Fractions Intervention at Third Grade. *Exceptional Children*, *87*(2), 163-182. https://doi.org/10.1177/0014402920924846

Fuchs, L. S., Zumeta, R. O., Schumacher, R. F., Powell, S. R., Seethaler, P. M., Hamlett, C. L., & Fuchs, D. (2010). The Effects of Schema-Broadening Instruction on Second Graders' Word-Problem Performance and Their Ability to Represent Word Problems with Algebraic Equations: A Randomized Control Study. *The Elementary School Journal*, *110*(4), 440-463. https://doi.org/10.1086/651191

Gersten, R., Rolfhus, E., Clarke, B., Decker, L. E., Wilkins, C., & Dimino, J. (2015). Intervention for First Graders With Limited Number Knowledge: Large-Scale Replication of a Randomized Controlled Trial. *American Educational Research Journal*, *52*(3), 516-546. https://doi.org/10.3102/0002831214565787

Greene, I., Tiernan, A. M., & Holloway, J. (2018). Cross-Age Peer Tutoring and Fluency-Based Instruction to Achieve Fluency with Mathematics Computation Skills: A Randomized Controlled Trial. *Journal of Behavioral Education*, *27*(2), 145-171. https://doi.org/10.1007/s10864-018-9291-1

Griffith, S. F., Hanson, K. G., Rolon-Arroyo, B., & Arnold, D. H. (2019). Promoting early achievement in low-income preschoolers in the United States with educational apps. *Journal of Children and Media*, *13*(3), 328-344. https://doi.org/10.1080/17482798.2019.1613246

Harper, J., & Schmidt, F. (2012). Preliminary effects of a group-based tutoring program for children in long-term foster care. *Children and Youth Services Review*, *34*(6), 1176-1182. https://doi.org/10.1016/j.childyouth.2012.01.040

Have, M., Nielsen, J. H., Ernst, M. T., Gejl, A. K., Fredens, K., Grøntved, A., & Kristensen, P. L. (2018). Classroom-based physical activity improves children's math achievement - A randomized controlled trial. *PLoS One*, *13*(12), e0208787-e0208787. https://doi.org/10.1371/journal.pone.0208787

Hawes, Z., Cain, M., Jones, S., Thomson, N., Bailey, C., Seo, J., Caswell, B., & Moss, J. (2020). Effects of a Teacher‐Designed and Teacher‐Led Numerical Board Game Intervention: A Randomized Controlled Study with 4‐ to 6‐Year‐Olds. *Mind, Brain and Education*, *14*(1), 71-80. https://doi.org/10.1111/mbe.12215

Hegedus, S. J., Dalton, S., & Tapper, J. R. (2015). The impact of technology-enhanced curriculum on learning advanced algebra in US high school classrooms. *Educational Technology Research and Development*, *63*(2), 203-228. https://doi.org/10.1007/s11423-015-9371-z

Hickey, A. J., & Flynn, R. J. (2019). Effects of the TutorBright tutoring programme on the reading and mathematics skills of children in foster care: A randomised controlled trial. *Oxford Review of Education*, *45*(4), 519-537. https://doi.org/10.1080/03054985.2019.1607724

Jayanthi, M., Gersten, R., Schumacher, R. F., Dimino, J., Smolkowski, K., & Spallone, S. (2021). Improving Struggling Fifth-Grade Students’ Understanding of Fractions: A Randomized Controlled Trial of an Intervention That Stresses Both Concepts and Procedures. *Exceptional Children*, *88*(1), 81-100. https://doi.org/10.1177/00144029211008851

Jitendra, A. K., Dupuis, D. N., Rodriguez, M. C., Zaslofsky, A. F., Slater, S., Cozine-Corroy, K., & Church, C. (2013). A Randomized Controlled Trial of the Impact of Schema-Based Instruction on Mathematical Outcomes for Third-Grade Students with Mathematics Difficulties. *The Elementary School Journal*, *114*(2), 252-276. https://doi.org/10.1086/673199

Jitendra, A. K., Harwell, M. R., Dupuis, D. N., & Karl, S. R. (2017). A Randomized Trial of the Effects of Schema-Based Instruction on Proportional Problem-Solving for Students With Mathematics Problem-Solving Difficulties. *Journal of Learning Disabilities*, *50*(3), 322-336. https://doi.org/10.1177/0022219416629646

Jitendra, A. K., Harwell, M. R., Dupuis, D. N., Karl, S. R., Lein, A. E., Simonson, G., & Slater, S. C. (2015). Effects of a Research-Based Intervention to Improve Seventh-Grade Students' Proportional Problem Solving: A Cluster Randomized Trial. *Journal of Educational Psychology*, *107*(4), 1019-1034. https://doi.org/10.1037/edu0000039

Jones, J. S., Milton, F., Mostazir, M., & Adlam, A. R. (2020). The academic outcomes of working memory and metacognitive strategy training in children: A double‐blind randomized controlled trial. *Developmental Science*, *23*(4), e12870-n/a. https://doi.org/10.1111/desc.12870

Jordan, N. C., Glutting, J., Dyson, N., Hassinger-Das, B., & Irwin, C. (2012). Building Kindergartners' Number Sense: A Randomized Controlled Study. *Journal of Educational Psychology*, *104*(3), 647-660. https://doi.org/10.1037/a0029018

Knatauskaitė, J., Pukėnas, K., Trinkūnienė, L., & Budde, H. (2021). A randomized controlled trial on the influence of two types of exercise training vs control on visuospatial processing and mathematical skills: The role of cortisol. *Physiology & Behavior*, *229*, 113213-113213. https://doi.org/10.1016/j.physbeh.2020.113213

Lakshminarayana, R., Eble, A., Bhakta, P., Frost, C., Boone, P., Elbourne, D., & Mann, V. (2013). The Support to Rural India's Public Education System (STRIPES) trial: a cluster randomised controlled trial of supplementary teaching, learning material and material support. *PLoS One*, *8*(7), e65775-e65775. https://doi.org/10.1371/journal.pone.0065775

Lee, H. K., & Choi, A. (2020). Enhancing early numeracy skills with a tablet-based math game intervention: a study in Tanzania. *Educational Technology Research and Development*, *68*(6), 3567-3585. https://doi.org/10.1007/s11423-020-09808-y

Lonigan, C. J., Phillips, B. M., Clancy, J. L., Landry, S. H., Swank, P. R., Assel, M., Taylor, H. B., Klein, A., Starkey, P., Domitrovich, C. E., Eisenberg, N., de Villiers, J., de Villiers, P., & Barnes, M. (2015). Impacts of a Comprehensive School Readiness Curriculum for Preschool Children at Risk for Educational Difficulties. *Child Development*, *86*(6), 1773-1793. https://doi.org/10.1111/cdev.12460

Lubans, D. R., Beauchamp, M. R., Diallo, T. M. O., Peralta, L. R., Bennie, A., White, R. L., Owen, K., & Lonsdale, C. (2018). School Physical Activity Intervention Effect on Adolescents’ Performance in Mathematics. *Medicine and Science in Sports and Exercise*, *50*(12), 2442-2450. https://doi.org/10.1249/MSS.0000000000001730

McTiernan, A., Holloway, J., Healy, O., & Hogan, M. (2016). A Randomized Controlled Trial of the Morningside Math Facts Curriculum on Fluency, Stability, Endurance and Application Outcomes. *Journal of Behavioral Education*, *25*(1), 49-68. https://doi.org/10.1007/s10864-015-9227-y

Mensch, B. S., Haberland, N., Soler-Hampejsek, E., Digitale, J., Jackson-Hachonda, N., Chelwa, N., Nyirenda, P., Chuang, E., Polen, L., Psaki, S. R., Kayeyi, N., & Mbizvo, M. T. (2021). Effects of an e-reader intervention on literacy, numeracy and non-verbal reasoning among adolescent girls in Zambia: evidence from a randomised controlled trial. *Journal of Development Effectiveness*, *13*(3), 247-275. https://doi.org/10.1080/19439342.2021.1953566

Montague, M., Krawec, J., Enders, C., & Dietz, S. (2014). The Effects of Cognitive Strategy Instruction on Math Problem Solving of Middle-School Students of Varying Ability. *Journal of Educational Psychology*, *106*(2), 469-481. https://doi.org/10.1037/a0035176

Nelson-Walker, N. J., Doabler, C. T., Fien, H., Gause, M., Baker, S. K., & Clarke, B. (2013). *Instructional Gaming: Using Technology to Support Early Mathematical Proficiency*.

Nelson, P. M., Burns, M. K., Kanive, R., & Ysseldyke, J. E. (2013). Comparison of a math fact rehearsal and a mnemonic strategy approach for improving math fact fluency. *Journal of School Psychology*, *51*(6), 659-667. https://doi.org/10.1016/j.jsp.2013.08.003

Núñez, J. C., Rosário, P., Vallejo, G., & González-Pienda, J. A. (2013). A longitudinal assessment of the effectiveness of a school-based mentoring program in middle school. *Contemporary Educational Psychology*, *38*(1), 11-21. https://doi.org/10.1016/j.cedpsych.2012.10.002

O'Connor, E. E., Cappella, E., McCormick, M. P., & McClowry, S. G. (2014). An Examination of the Efficacy of INSIGHTS in Enhancing the Academic and Behavioral Development of Children in Early Grades. *Journal of Educational Psychology*, *106*(4), 1156-1169. https://doi.org/10.1037/a0036615

Outhwaite, L. A., Faulder, M., Gulliford, A., & Pitchford, N. J. (2019). Raising Early Achievement in Math With Interactive Apps: A Randomized Control Trial. *Journal of Educational Psychology*, *111*(2), 284-298. https://doi.org/10.1037/edu0000286

Pane, J. F., Griffin, B. A., McCaffrey, D. F., & Karam, R. (2014). Effectiveness of Cognitive Tutor Algebra I at Scale. *Educational Evaluation and Policy Analysis*, *36*(2), 127-144. https://doi.org/10.3102/0162373713507480

Piper, B., Ralaingita, W., Akach, L., & King, S. (2016). Improving procedural and conceptual mathematics outcomes: evidence from a randomised controlled trial in Kenya. *Journal of Development Effectiveness*, *8*(3), 404-422. https://doi.org/10.1080/19439342.2016.1149502

Piper, B., Simmons Zuilkowski, S., Dubeck, M., Jepkemei, E., & King, S. J. (2018). Identifying the essential ingredients to literacy and numeracy improvement: Teacher professional development and coaching, student textbooks, and structured teachers’ guides. *World Development*, *106*, 324-336. https://doi.org/10.1016/j.worlddev.2018.01.018

Pitchford, N. J. (2015). Development of early mathematical skills with a tablet intervention: a randomized control trial in Malawi. *Frontiers in Psychology*, *6*, 485-485. https://doi.org/10.3389/fpsyg.2015.00485

Powell, S. R., Berry, K. A., Fall, A.-M., Roberts, G., Barnes, M. A., Fuchs, L. S., Martinez-Lincoln, A., Forsyth, S. R., Vinsonhaler, R. K., Benz, S. A., Zaparolli, B. L., & Lin, X. (2022). Does Word-Problem Performance Maintain? Follow-Up One Year After Implementation of a Word-Problem Intervention. *Journal of Research on Educational Effectiveness*, *15*(1), 52-77. https://doi.org/10.1080/19345747.2021.1961332

Praet, M., & Desoete, A. (2014). Enhancing young children's arithmetic skills through non-intensive, computerised kindergarten interventions: A randomised controlled study. *Teaching and Teacher Education*, *39*, 56-65. https://doi.org/10.1016/j.tate.2013.12.003

Raudenbush, S. W., Hernandez, M., Goldin-Meadow, S., Carrazza, C., Foley, A., Leslie, D., Sorkin, J. E., & Levine, S. C. (2020). Longitudinally adaptive assessment and instruction increase numerical skills of preschool children. *Proceedings of the National Academy of Sciences - PNAS*, *117*(45), 27945-27953. https://doi.org/10.1073/pnas.2002883117

Rohrer, D., Dedrick, R. F., Hartwig, M. K., & Cheung, C.-N. (2020). A Randomized Controlled Trial of Interleaved Mathematics Practice. *Journal of Educational Psychology*, *112*(1), 40-52. https://doi.org/10.1037/edu0000367

Rosenfeld, D., Dominguez, X., Llorente, C., Pasnik, S., Moorthy, S., Hupert, N., Gerard, S., & Vidiksis, R. (2019). A curriculum supplement that integrates transmedia to promote early math learning: A randomized controlled trial of a PBS KIDS intervention. *Early Childhood Research Quarterly*, *49*, 241-253. https://doi.org/10.1016/j.ecresq.2019.07.003

Rutherford, T., Farkas, G., Duncan, G., Burchinal, M., Kibrick, M., Graham, J., Richland, L., Tran, N., Schneider, S., Duran, L., & Martinez, M. E. (2014). A Randomized Trial of an Elementary School Mathematics Software Intervention: Spatial-Temporal Math. *Journal of Research on Educational Effectiveness*, *7*(4), 358-383. https://doi.org/10.1080/19345747.2013.856978

Sarama, J., Clements, D. H., Wolfe, C. B., & Spitler, M. E. (2012). Longitudinal Evaluation of a Scale-Up Model for Teaching Mathematics With Trajectories and Technologies. *Journal of Research on Educational Effectiveness*, *5*(2), 105-135. https://doi.org/10.1080/19345747.2011.627980

Schacter, J., Shih, J., Allen, C. M., DeVaul, L., Adkins, A. B., Ito, T., & Jo, B. (2016). Math Shelf: A Randomized Trial of a Prekindergarten Tablet Number Sense Curriculum. *Early Education and Development*, *27*(1), 74-88. https://doi.org/10.1080/10409289.2015.1057462

Schenke, K., Redman, E. J. K. H., Chung, G. K. W. K., Chang, S. M., Feng, T., Parks, C. B., & Roberts, J. D. (2020). Does “Measure Up!” measure up? Evaluation of an iPad app to teach preschoolers measurement concepts. *Computers and Education*, *146*, 103749. https://doi.org/10.1016/j.compedu.2019.103749

Schmitt, S. A., Korucu, I., Napoli, A. R., Bryant, L. M., & Purpura, D. J. (2018). Using block play to enhance preschool children’s mathematics and executive functioning: A randomized controlled trial. *Early Childhood Research Quarterly*, *44*, 181-191. https://doi.org/10.1016/j.ecresq.2018.04.006

Schüler-Meyer, A., Prediger, S., Kuzu, T., Wessel, L., & Redder, A. (2019). Is Formal Language Proficiency in the Home Language Required to Profit from a Bilingual Teaching Intervention in Mathematics? A Mixed Methods Study on Fostering Multilingual Students’ Conceptual Understanding. *International Journal of Science and Mathematics Education*, *17*(2), 317-339. https://doi.org/10.1007/s10763-017-9857-8

Shanley, L., Clarke, B., Anderson, D. A., Turtura, J., Doabler, C. T., Kurtz-Nelson, E., & Fien, H. (2019). Exploring the Utility of Assessing Early Mathematics Intervention Response via Embedded Assessment. *School Psychology*, *34*(5), 541-554. https://doi.org/10.1037/spq0000326

Swanson, H. L. (2016). Word Problem Solving, Working Memory and Serious Math Difficulties: Do Cognitive Strategies Really Make a Difference? *Journal of Applied Research in Memory and Cognition*, *5*(4), 368-383. https://doi.org/10.1016/j.jarmac.2016.04.012

Thomas, J., Cook, T. D., Klein, A., Starkey, P., & DeFlorio, L. (2018). The Sequential Scale-Up of an Evidence-Based Intervention: A Case Study. *Evaluation Review*, *42*(3), 318-357. https://doi.org/10.1177/0193841X18786818

Topping, K. J., Miller, D., Murray, P., Henderson, S., Fortuna, C., & Conlin, N. (2011). Outcomes in a randomised controlled trial of mathematics tutoring. *Educational Research (Windsor)*, *53*(1), 51-63. https://doi.org/10.1080/00131881.2011.552239

van den Berg, V., Singh, A. S., Komen, A., Hazelebach, C., van Hilvoorde, I., & Chinapaw, M. J. M. (2019). Integrating Juggling with Math Lessons: A Randomized Controlled Trial Assessing Effects of Physically Active Learning on Maths Performance and Enjoyment in Primary School Children. *International Journal of Environmental Research and Public Health*, *16*(14), 2452. https://doi.org/10.3390/ijerph16142452

Van der Scheer, E. A., & Visscher, A. J. (2018). Effects of a data-based decision-making intervention for teachers on students’ mathematical achievement. *Journal of Teacher Education*, *69*(3), 307-320. https://doi.org/10.1177/0022487117704170

Van Der Heyden, A., McLaughlin, T., Algina, J., & Snyder, P. (2012). Randomized Evaluation of a Supplemental Grade-Wide Mathematics Intervention. *American Educational Research Journal*, *49*(6), 1251-1284. https://doi.org/10.3102/0002831212462736

Wakabayashi, T., Andrade-Adaniya, F., Schweinhart, L. J., Xiang, Z., Marshall, B. A., & Markley, C. A. (2020). The impact of a supplementary preschool mathematics curriculum on children's early mathematics learning. *Early Childhood Research Quarterly*, *53*, 329-342. https://doi.org/10.1016/j.ecresq.2020.04.002

Whittaker, J. V., Kinzie, M. B., Vitiello, V., DeCoster, J., Mulcahy, C., & Barton, E. A. (2020). Impacts of an Early Childhood Mathematics and Science Intervention on Teaching Practices and Child Outcomes. *Journal of Research on Educational Effectiveness*, *13*(2), 177-212. https://doi.org/10.1080/19345747.2019.1710884

Wood, T., Mazzocco, M. M. M., Calhoon, M. B., Crowe, E. C., & Connor, C. M. (2020). The Effect of Peer-Assisted Mathematics Learning Opportunities in First Grade Classrooms: What Works for Whom? *Journal of Research on Educational Effectiveness*, *13*(4), 601-624. https://doi.org/10.1080/19345747.2020.1772422

Xin, Y. P., Tzur, R., Hord, C., Liu, J., Park, J. Y., & Si, L. (2017). An Intelligent Tutor-Assisted Mathematics Intervention Program for Students With Learning Difficulties. *Learning Disability Quarterly*, *40*(1), 4-16. https://doi.org/10.1177/0731948716648740
